# Supplementary material for: Ribonuclease L mediates the cell-lethal phenotype of double-stranded RNA editing enzyme ADAR1 deficiency in a human cell line
Source: eLife. 2017 Mar 31;6:e25687. doi: 10.7554/eLife.25687 (PMC5404912; doi:10.7554/eLife.25687)
Supplement: Figure 2—source data 1. — DOI: http://dx.doi.org/10.7554/eLife.25687.005 [file elife-25687-fig2-data1.xlsx]

## Sheet: Sheet1
Quantification of PKR
		Mock	IFN-α 1000U	Fold change
Figure 2a	WT	10210.5	17979.8	1.76091
14μg/lane	p150 KO	9367.03	2761.13	0.294771
	Rnase L KO	7069.89	13661.6	1.93237
	Rnase L-ADAR1 DKO	8394.55	5275.01	0.628385
	MAVS KO	8796.89	13742	1.56214
	MAVS-p150 DKO	7678.96	4134.3	0.538393
	MAVS-ADAR1 DKO	6315.57	5616.18	0.889259
