# Supplementary material for: Ribonuclease L mediates the cell-lethal phenotype of double-stranded RNA editing enzyme ADAR1 deficiency in a human cell line
Source: eLife. 2017 Mar 31;6:e25687. doi: 10.7554/eLife.25687 (PMC5404912; doi:10.7554/eLife.25687)
Supplement: Figure 3—source data 1. — DOI: http://dx.doi.org/10.7554/eLife.25687.009 [file elife-25687-fig3-data1.xlsx]

## Sheet: Sheet1
Figure 3b		WT			RNASEL-KO			MAVS-KO			PKR-KO			RNASEL-MAVS DKO
pIC Induced A549 cell death	Time(Hours)	Average	SD	N	Average	SD	N	Average	SD	N	Average	SD	N	Average	SD	N
	0:00:00	97.0841	0.314955	4	99.137	0.432195	4	97.4468	0.250175	4	83.5231	7.84943	4	91.6451	2.41571	4
	3:00:00	98.589	0.15545	4	99.8085	0.0822143	4	98.0494	0.065269	4	93.2558	2.52484	4	91.329	1.42247	4
	6:00:00	98.8402	0.0444498	4	99.9506	0.0348429	4	98.2035	0.0102884	4	95.2978	1.39804	4	92.0022	1.21622	4
	9:00:00	98.7439	0.138981	4	99.9532	0.0308683	4	98.0874	0.0469734	4	95.7305	1.09115	4	92.506	0.999628	4
	12:00:00	98.3942	0.243745	4	99.9564	0.0205445	4	97.8039	0.111184	4	95.1517	1.14812	4	92.8443	0.938354	4
	15:00:00	97.109	0.507462	4	99.8378	0.0531754	4	96.9335	0.166173	4	92.5092	1.38633	4	93.2081	0.977269	4
	18:00:00	92.5516	0.963619	4	99.6438	0.111483	4	93.8683	0.369691	4	85.8712	2.32926	4	93.2039	0.832101	4
	21:00:00	81.7978	1.71333	4	98.7462	0.480516	4	88.3612	0.824063	4	75.155	3.40831	4	92.899	0.728826	4
	24:00:00	64.738	1.78774	4	96.9545	1.15619	4	79.5232	0.9742	4	61.0735	4.73732	4	92.4252	1.03377	4
	27:00:00	44.4277	2.79714	4	93.9616	2.09218	4	69.0918	0.574815	4	43.1188	3.51147	4	91.9069	0.797302	4
	30:00:00	26.7216	2.96524	4	90.3047	2.68741	4	59.5968	1.99678	4	26.7119	4.00746	4	91.2642	0.724237	4
	33:00:00	15.912	3.54872	4	86.9697	3.02478	4	50.2788	1.49721	4	9.07442	5.62902	4	90.8693	0.932335	4
Figure 3c		WT			RNASEL-KO			MAVS-KO			PKR-KO			RNASEL-MAVS DKO
Caspase3/7 activity	Time(Hours)	Average	SD	N	Average	SD	N	Average	SD	N	Average	SD	N	Average	SD	N
	0:00:00	0.000976553	0.0004038	4	0.0035407	0.000250054	4	0.000855523	0.00101615	4	0.000589467	0.000806201	4	0.000156446	9.8379e-05	4
	3:00:00	0.000368069	0.000196293	4	0.00870341	0.00128597	4	0.000615985	0.000670649	4	0.000607963	0.000443376	4	0.000304062	9.19375e-05	4
	6:00:00	0.000292136	9.42895e-05	4	0.00950039	0.00133329	4	0.000779618	0.000473256	4	0.000861651	0.000345944	4	0.000496687	0.000129572	4
	9:00:00	0.00143961	0.00052033	4	0.00995742	0.00153875	4	0.00571138	0.00181073	4	0.00617266	0.00129983	4	0.000736932	8.79582e-05	4
	12:00:00	0.0158364	0.00252672	4	0.0102183	0.00127166	4	0.0396354	0.00897309	4	0.0458781	0.0103314	4	0.000935905	8.58476e-05	4
	15:00:00	0.0864198	0.00815076	4	0.0118174	0.00167469	4	0.133436	0.0234309	4	0.210167	0.0346005	4	0.00133584	0.000165685	4
	18:00:00	0.278516	0.0168021	4	0.016669	0.00333157	4	0.286624	0.0405782	4	0.547233	0.0386745	4	0.00183714	0.000162076	4
	21:00:00	0.573208	0.0178654	4	0.0350126	0.00899873	4	0.493407	0.0541679	4	0.862237	0.0165424	4	0.00280388	0.00023389	4
	24:00:00	0.916348	0.0374647	4	0.076487	0.0218339	4	0.735556	0.0498767	4	1.04391	0.0269476	4	0.00423837	0.000584925	4
Figure 3d
Wound healing assay
		WT			RNASEL KO			MAVS KO			RNASEL-MAVS DKO
	Time(Hours)	Average	SD	N	Average	SD	N	Average	SD	N	Average	SD	N
	0:00:00	0	0	8	0	0	8	0	0	8	0	0	8
	2:00:00	3.8553	0.452431	8	7.06897	1.71003	8	4.38789	0.468512	8	6.94583	0.746805	8
	4:00:00	6.62785	0.802688	8	15.9651	3.92616	8	7.84096	0.807866	8	15.4682	1.917	8
	6:00:00	8.55931	1.00292	8	23.0097	5.5668	8	10.5302	1.13183	8	22.8536	3.39927	8
	8:00:00	10.1543	1.17584	8	29.2272	7.12718	8	12.3296	1.26853	8	29.1599	4.56409	8
	10:00:00	11.2447	1.41116	8	34.7927	8.41027	8	14.0857	1.53655	8	34.3799	5.48067	8
	12:00:00	12.4671	1.61197	8	39.1109	9.18808	8	15.7787	1.72302	8	39.191	6.21819	8
	14:00:00	13.3295	1.73026	8	44.1771	10.344	8	17.0502	1.92593	8	43.2771	6.80029	8
	16:00:00	14.2679	2.02544	8	47.6637	11.0507	8	18.6737	2.22951	8	46.8037	7.44309	8
	18:00:00	15.0706	2.13803	8	50.6229	11.6775	8	20.2825	2.43721	8	50.3474	7.82069	8
	20:00:00	15.8409	2.30696	8	53.2456	12.0005	8	21.8102	2.59189	8	53.0864	8.07102	8
	22:00:00	16.7542	2.4218	8	55.6051	12.2226	8	23.2708	2.6492	8	56.0378	8.14419	8
			WT	WT		WT	WT		WT	WT		WT	WT		WT	WT		RNASEL KO	RNASEL KO		RNASEL KO	RNASEL KO		RNASEL KO	RNASEL KO		RNASEL KO	RNASEL KO		RNASEL KO	RNASEL KO
Figure 3e		PIC	0ng/ml	0ng/ml		20ng/ml	20ng/ml		50ng/ml	50ng/ml		100ng/ml	100ng/ml		250ng/ml	250ng/ml		0ng/ml	0ng/ml		20ng/ml	20ng/ml		50ng/ml	50ng/ml		100ng/ml	100ng/ml		250ng/ml	250ng/ml
pIC induced HME cell death
	Time(Hours)		Average	SD	N	Average	SD	N	Average	SD	N	Average	SD	N	Average	SD	N	Average	SD	N	Average	SD	N	Average	SD	N	Average	SD	N	Average	SD	N
	0:00:00		96.184	3.32022	4	83.5631	13.6931	4	95.5376	3.11308	4	89.8729	8.9215	4	95.2551	1.58332	4	96.5649	3.56989	4	94.9536	6.43777	4	94.7856	3.87115	4	96.3232	3.3607	4	97.3722	1.32998	4
	2:00:00		96.8198	2.92355	4	85.9825	11.6921	4	96.1401	2.83971	4	90.3596	7.4493	4	95.7072	1.55621	4	96.5583	3.41589	4	95.4401	5.35719	4	94.8054	3.49607	4	96.6107	2.93154	4	97.6153	1.10752	4
	4:00:00		97.2114	2.34991	4	88.0879	9.14183	4	96.2596	2.36398	4	91.2713	5.99868	4	95.5662	1.21497	4	96.3136	2.77762	4	95.0713	3.97053	4	94.5695	2.75463	4	96.8436	2.51017	4	97.0104	1.25496	4
	6:00:00		97.1412	2.16206	4	87.1505	8.33981	4	94.5938	2.32579	4	90.9242	4.45139	4	93.8148	1.27197	4	95.6713	2.43036	4	93.3906	3.21882	4	92.3863	3.33485	4	95.9362	2.30044	4	94.561	2.4104	4
	8:00:00		96.8323	1.86164	4	85.6853	7.59915	4	91.8806	1.99273	4	87.6199	4.94914	4	90.054	1.36432	4	94.8205	2.09505	4	92.2743	2.65558	4	90.7299	3.80131	4	95.1177	2.21059	4	92.9713	2.79079	4
	10:00:00		96.8972	1.5432	4	83.7782	7.73671	4	88.4474	2.23351	4	84.5539	4.58001	4	82.7691	1.09688	4	94.3736	2.23607	4	90.5162	2.13754	4	89.26	4.9137	4	94.4148	2.38267	4	91.6708	3.22258	4
	12:00:00		96.1297	1.54547	4	81.5082	6.17079	4	84.1114	2.68567	4	79.7441	2.80232	4	75.1621	2.25219	4	93.9452	2.33452	4	90.9842	2.23375	4	89.7734	4.49802	4	93.4524	2.12734	4	90.2833	2.73863	4
	14:00:00		96.7155	1.15975	4	77.7347	6.26037	4	78.6461	3.1514	4	70.6058	4.36753	4	62.1127	6.60545	4	93.5571	3.15168	4	91.0989	1.86105	4	87.8275	4.93403	4	91.1651	2.11639	4	88.2581	3.40405	4
	16:00:00		96.7615	1.29442	4	73.3079	4.24903	4	70.5818	3.48544	4	58.1308	2.99488	4	38.9899	1.97945	4	93.7358	2.52781	4	92.0029	1.85584	4	87.9375	4.05863	4	88.8337	2.6635	4	85.5013	3.62988	4
	18:00:00		97.0635	1.01436	4	67.7972	3.6418	4	59.4892	4.19338	4	35.9833	6.42136	4	20.8226	11.6238	4	93.8295	2.57032	4	91.1831	1.21181	4	85.6725	5.43475	4	84.9479	2.73933	4	81.7894	3.39308	4
	20:00:00		97.1905	1.02032	4	60.4782	4.10889	4	46.6457	4.45645	4	29.0768	2.95079	4	1.52645	4.87256	4	94.4071	2.78356	4	90.9493	1.41334	4	84.4423	4.86596	4	82.9766	4.14216	4	80.2792	4.34904	4
