# Supplementary material for: Ribonuclease L mediates the cell-lethal phenotype of double-stranded RNA editing enzyme ADAR1 deficiency in a human cell line
Source: eLife. 2017 Mar 31;6:e25687. doi: 10.7554/eLife.25687 (PMC5404912; doi:10.7554/eLife.25687)
Supplement: Figure 4—source data 1. — DOI: http://dx.doi.org/10.7554/eLife.25687.012 [file elife-25687-fig4-data1.xlsx]

## Sheet: Sheet1
Figure 4a		WT			RNASEL-ADAR DKO			MAVS-ADAR1 DKO
pIC Induced cell death	Time(Hours)	Average	SD	N	Average	SD	N	Average	SD	N
	0:00:00	97.0841	0.314955	4	98.4878	0.367016	4	97.5492	0.135285	4
	3:00:00	98.589	0.15545	4	98.5668	0.273425	4	98.1518	0.285286	4
	6:00:00	98.8402	0.0444498	4	98.8324	0.179653	4	98.1226	0.319139	4
	9:00:00	98.7439	0.138981	4	98.7616	0.292721	4	98.0045	0.283192	4
	12:00:00	98.3942	0.243745	4	98.5732	0.392555	4	97.6619	0.148317	4
	15:00:00	97.109	0.507462	4	98.1526	0.565943	4	96.3349	0.212395	4
	18:00:00	92.5516	0.963619	4	97.4474	0.620049	4	92.8233	0.867592	4
	21:00:00	81.7978	1.71333	4	96.3733	0.502213	4	86.9011	1.08919	4
	24:00:00	64.738	1.78774	4	94.7905	0.673354	4	77.373	2.32054	4
	27:00:00	44.4277	2.79714	4	91.75	0.388716	4	66.2737	2.4601	4
	30:00:00	26.7216	2.96524	4	85.6861	1.51237	4	56.2794	3.10571	4
	33:00:00	15.912	3.54872	4	74.279	3.18479	4	47.5212	3.58969	4
Figure 3C
RNaseL Expression Induced Cell death		RNASEL KO Mock			RNASEL KO RNase L			RNASEL KO RNase LR667A			RNASEL-ADAR1 DKO Mock			RNASEL-ADAR1 DKO RNase L			RNASEL-ADAR1 DKO RNase LR667A
	Time(Hours)	Average	SD	N	Average	SD	N	Average	SD	N	Average	SD	N	Average	SD	N	Average	SD	N
	0:00:00	99.1566	0.209263	4	99.2147	0.0683082	4	99.3205	0.138105	4	98.9002	0.220504	4	98.8429	0.161685	4	98.7384	0.293596	4
	3:00:00	98.955	0.137631	4	98.9128	0.294301	4	99.0484	0.0740398	4	97.3715	0.458157	4	97.4703	0.280096	4	97.3366	0.468825	4
	6:00:00	99.2469	0.127928	4	99.2201	0.144353	4	99.2111	0.137085	4	97.947	0.235877	4	98.148	0.220164	4	97.888	0.390609	4
	9:00:00	99.461	0.0426572	4	99.4309	0.074101	4	99.4229	0.0795353	4	98.2721	0.344275	4	98.357	0.287914	4	98.2206	0.266408	4
	12:00:00	99.5422	0.0174773	4	99.4766	0.118417	4	99.5109	0.0947211	4	98.3429	0.384357	4	98.1961	0.376879	4	98.3302	0.237038	4
	15:00:00	99.3111	0.0604154	4	99.292	0.140426	4	99.3334	0.135639	4	98.3508	0.409006	4	97.9717	0.397248	4	98.3388	0.252525	4
	18:00:00	98.9969	0.0337678	4	98.9792	0.169259	4	99.0576	0.127246	4	98.2982	0.393799	4	97.6751	0.346534	4	98.2048	0.267263	4
	21:00:00	98.8335	0.057039	4	98.7861	0.133013	4	98.7698	0.123456	4	98.0245	0.468557	4	97.1894	0.360079	4	97.8839	0.296478	4
	24:00:00	98.8802	0.0341933	4	98.8246	0.10826	4	98.7913	0.122826	4	97.7678	0.504283	4	96.3022	0.351063	4	97.5971	0.286848	4
	27:00:00	98.8515	0.0704506	4	98.8172	0.102008	4	98.7322	0.0670236	4	97.2989	0.630572	4	94.8093	0.375147	4	97.1311	0.391091	4
	30:00:00	98.7153	0.0659171	4	98.6166	0.172841	4	98.5478	0.0555384	4	96.5631	0.752223	4	92.393	0.498983	4	96.5213	0.467009	4
	33:00:00	98.4695	0.123095	4	98.35	0.155141	4	98.2741	0.0994554	4	95.7535	0.858639	4	89.5048	0.355634	4	95.6684	0.70424	4
	36:00:00	98.193	0.113991	4	97.9201	0.270416	4	97.9117	0.127345	4	94.373	1.03888	4	85.0717	0.592192	4	94.5302	1.03078	4
	39:00:00	97.7204	0.159434	4	97.4467	0.258303	4	97.4734	0.159067	4	93.5782	0.527557	4	78.5444	0.984328	4	93.6867	0.986614	4
	42:00:00	97.1706	0.301136	4	96.859	0.349724	4	96.9523	0.187125	4	93.6485	0.559275	4	68.9071	1.47906	4	93.7546	1.02413	4
	45:00:00	96.5912	0.257764	4	96.2835	0.289937	4	96.291	0.318281	4	93.486	0.427052	4	50.4627	2.71599	4	93.5857	1.0881	4
	48:00:00	95.9606	0.447038	4	95.5075	0.634645	4	95.6891	0.369793	4	93.4298	0.530548	4	30.6139	1.74115	4	93.4435	0.937896	4
	51:00:00	94.4655	0.724773	4	93.8473	0.763626	4	94.2467	0.425753	4	92.9139	0.431623	4	14.8711	2.98489	4	93.0049	0.879468	4
	54:00:00	91.9585	0.985463	4	91.5533	0.796672	4	92.0184	0.57589	4	92.3496	0.453431	4	12.3415	3.62062	4	92.3808	0.850854	4
	57:00:00	89.2188	1.02349	4	88.843	0.478887	4	89.5194	0.641447	4	91.7497	0.328694	4	11.552	2.29285	4	91.8517	0.730113	4
	60:00:00	86.0456	0.967071	4	85.7011	0.680817	4	86.208	0.454882	4	91.0848	0.436403	4	11.5759	3.04889	4	91.1107	0.682741	4
	63:00:00	82.9042	0.767614	4	82.7265	0.228912	4	83.2385	0.482542	4	90.1556	0.556867	4	7.77778	3.60897	4	90.1404	0.592681	4
	66:00:00	79.2923	0.627101	4	79.4863	0.489274	4	79.5851	0.625721	4	88.8276	0.386606	4	6.17363	3.88385	4	88.8172	0.490117	4
	69:00:00	75.5995	0.538319	4	76.3905	0.539598	4	76.123	1.0668	4	87.1653	0.522069	4	-1.05045	5.23441	4	87.3055	0.410966	4
	72:00:00	71.1292	1.39979	4	72.6643	0.775	4	71.7189	1.33575	4	85.6384	0.533355	4	-5.27459	4.15109	4	85.6332	0.422538	4
