# Supplementary material for: Ribonuclease L mediates the cell-lethal phenotype of double-stranded RNA editing enzyme ADAR1 deficiency in a human cell line
Source: eLife. 2017 Mar 31;6:e25687. doi: 10.7554/eLife.25687 (PMC5404912; doi:10.7554/eLife.25687)
Supplement: Figure 5—source data 1. — DOI: http://dx.doi.org/10.7554/eLife.25687.018 [file elife-25687-fig5-data1.xlsx]

## Sheet: Sheet1
Quantification of PKR
		Mock	IFN-α1000U	Fold change
Figure 5a	WT	5934.01	20704.8	3.48917
17μg/lane	NS2-WT	5777.08	22853	3.95581
	NS2-ADAR1 KO	6347.03	3627.96	0.5716
