# Supplementary material for: Ribonuclease L mediates the cell-lethal phenotype of double-stranded RNA editing enzyme ADAR1 deficiency in a human cell line
Source: eLife. 2017 Mar 31;6:e25687. doi: 10.7554/eLife.25687 (PMC5404912; doi:10.7554/eLife.25687)
Supplement: Figure 6—source data 1. — DOI: http://dx.doi.org/10.7554/eLife.25687.021 [file elife-25687-fig6-data1.xlsx]

## Sheet: Sheet1
Figure 6
Quantitation of gene expression by qPCR
		IFN-β	WT			RNaseL-KO			MAVS-KO			RNaseL ADAR1 KO			MAVS ADAR1 KO			p150-KO			MAVS p150-KO
			Average	SD	N	Average	SD	N	Average	SD	N	Average	SD	N	Average	SD	N	Average	SD	N	Average	SD	N
		Mock	-6.12787	0.306856	3	-5.69589	0.898454	3	-5.25955	0.535706	3	-6.41883	0.34952	3	-5.3375	0.873858	3	-5.60179	0.124266	3	-5.37646	0.112861	3
		IFN-α 10U	-5.94396	0.726571	3	-6.45452	0.211124	3	-5.21127	0.869549	3	-2.94586	0.395652	3	-4.55707	0.498974	3	-4.10575	0.0774045	3	-4.84717	0.171266	3
		pair										Mock VS IFN						Mock VS IFN			Mock VS IFN
		p value	ns			ns				ns		P=0.000497518569846877			ns			P=0.0001099194931159			p=0.014
		IFN-λ	WT			RNaseL-KO			MAVS-KO			RNaseL ADAR1 KO			MAVS ADAR1 KO			p150-KO			MAVS p150-KO
			Average	SD	N	Average	SD	N	Average	SD	N	Average	SD	N	Average	SD	N	Average	SD	N
		Mock	-5.32204	0.586097	3	-5.78788	0.192837	3	-5.99863	0.539771	3	-4.92707	0.543228	3	-5.71418	0.460558	3	-5.05233	0.158299	3	-5.68699	0.0937609	3
		IFN-α 10U	-4.5792	0.476002	3	-4.97621	0.407499	3	-5.68126	0.266683	3	-1.43504	0.236463	3	-3.58	0.473909	3	-1.65628	0.0140864	3	-3.34448	0.0638697	3
		pair	Mock VS IFN			Mock VS IFN			Mock VS IFN			Mock VS IFN			Mock VS IFN			Mock VS IFN			Mock VS IFN
		p value	ns			P=0.0405426226440551			ns			p=0.001			p=0.007			P=0.000729181903544013			P=6.55445359555238E-06
		pair				RL-KO VS RL-ADAR1 KO		with IFN				RNaseL-ADAR1 KO VS MAVS-ADAR1 KO			with IFN
		p value				P=0.000373941302955246						P=0.00405851881434209
		OAS2	WT			RNaseL-KO			MAVS-KO			RNaseL ADAR1 KO			MAVS ADAR1 KO			p150-KO			MAVS p150-KO
			Average	SD	N	Average	SD	N	Average	SD	N	Average	SD	N	Average	SD	N	Average	SD	N	Average	SD	N
		Mock	-4.797	0.572774	3	-5.28938	0.193034	3	-4.8961	0.630123	3	-4.72586	0.217848	3	-5.10787	0.194334	3	-4.7791	0.185917		-5.21968	0.136025	3
		IFN-α 10U	-2.38682	0.179927	3	-1.88699	0.359575	3	-2.235	0.320273	3	-0.288537	0.245965	3	-1.61088	0.397039	3	-0.837144	0.0484162		-1.17557	0.0109475	3
		pair	Mock VS IFN			Mock VS IFN						Mock VS IFN			Mock VS IFN			Mock VS IFN			Mock VS IFN
		p value	p=0.004			P=0.000164707327435187			p=0.005			P=2.93815202387241E-05			p=0.0001			P=8.04581324222742E-06			P=0.000379338090216397
		pair				RL-KO VS RL-ADAR1 KO		with IFN				RNaseL-ADAR1 KO VS MAVS-ADAR1 KO
		p value				P=0.00536794943751604						P=0.0136632232569993
		IFIT1	WT			RNaseL-KO			MAVS-KO			RNaseL ADAR1 KO			MAVS ADAR1 KO			p150-KO			MAVS p150-KO
			Average	SD	N	Average	SD	N	Average	SD	N	Average	SD	N	Average	SD	N	Average	SD	N	Average	SD	N
		Mock	-3.39893	0.641781	3	-3.05581	0.496203	3	-3.07089	0.619243	3	-3.11971	0.337457	3	-3.02048	0.448593	3	-4.19433	0.0286962	3	-3.99193	0.0104236	3
		IFN-α 10U	-2.02512	0.504611	3	-1.54634	0.573662	3	-1.68493	0.508061	3	-0.212271	0.491907	3	-1.50709	0.595348	3	-1.47421	0.0260382	3	-2.04091	0.0369055	3
		pair	Mock VS IFN			Mock VS IFN			Mock VS IFN			Mock VS IFN			Mock VS IFN			Mock VS IFN			Mock VS IFN
		p value	ns			p=0.03			ns			p=0.001			p=0.03			P=4.45478637544453E-08			P=1.06906663513437E-07
