# Supplementary material for: Ribonuclease L mediates the cell-lethal phenotype of double-stranded RNA editing enzyme ADAR1 deficiency in a human cell line
Source: eLife. 2017 Mar 31;6:e25687. doi: 10.7554/eLife.25687 (PMC5404912; doi:10.7554/eLife.25687)
Supplement: Figure 7—source data 1. — DOI: http://dx.doi.org/10.7554/eLife.25687.023 [file elife-25687-fig7-data1.xlsx]

## Sheet: Sheet1
Figure 5a		WT			RNASEL-KO			MAVS-KO			RNASEL-ADAR1 DKO			MAVS-ADAR1 DKO
2-5 A level		Average	SD	N	Average	SD	N	Average	SD	N	Average	SD	N	Average	SD	N
	Mock	4.09091	0.279407	3	4.38843	0.520661	3	4.53719	0.739242	3	4.39669	0.496074	3	4.04132	0.333561	3
	IFN	4.45455	0.165083	3	3.98347	0.683656	3	4.17355	1.13464	3	9.93388	1.94155	3	6.1157	0.792743	3
	pair				VS	RNAseL-ADAR1 KO		VS	MAVS-ADAR1 DKO
	p value				P=0.0140822920683426			P=0.1
Figure 5c	WT			RNASEL KO			RNASEL-ADAR1 DKO			MAVS KO			MAVS-ADAR1 DKO
tRAN-His Cleavge products quantitation by qPCR	Average	SD	N	Average	SD	N	Average	SD	N	Average	SD	N	Average	SD	N
	2.19433	1.3643	3	1.09853	0.0847471	3	1.31353	0.175902	3	1.66367	1.14022	3	27.8156	3.12811	3
	pair										VS	MAVS-ADAR1 DKO
	p value										P=0.000189015950522754
